# Supplementary material for: Responses of renal hemodynamics and tubular functions to acute sodium–glucose cotransporter 2 inhibitor administration in non-diabetic anesthetized rats
Source: PubMed Central journal article supplement (PMC5572725; doi:10.1038/s41598-017-09352-5), 2017-08-25

## **Supplementary information**

### **Responses of renal hemodynamics and tubular functions to acute sodium–glucose cotransporter 2 inhibitor administration in non-diabetic anesthetized rats**

Tuba M. Ansary<sup>1</sup>, Yoshihide Fujisawa<sup>2</sup>, Asadur Rahman<sup>1</sup>, Daisuke Nakano<sup>1</sup>, Hirofumi Hitomi<sup>1</sup>, Hideki Kobara<sup>3</sup>, Tsutomu Masaki<sup>3</sup>, Jens M. Titze<sup>4</sup>, Kento Kitada<sup>1,4</sup>, Akira Nishiyama<sup>1</sup>

<sup>1</sup>Department of Pharmacology, Faculty of Medicine, Kagawa University, Kagawa, Japan

<sup>2</sup>Life Science Research Center, Faculty of Medicine, Kagawa University, Kagawa, Japan

<sup>3</sup>Department of Gastroenterology and Neurology, Faculty of Medicine, Kagawa University, Kagawa, Japan

<sup>4</sup>Division of Clinical Pharmacology, Vanderbilt University School of Medicine,

Nashville, TN, USA

**Corresponding author**

Akira Nishiyama, MD, PhD

Department of Pharmacology, Faculty of Medicine, Kagawa University, 1750-1

Ikenobe, Miki-cho, Kita-gun, Kagawa 761-0793, Japan

Tel.: +81 87 891 2125

Fax: +81 87 891 2126

E-mail: [akira@kms.ac.jp](mailto:akira@kms.ac.jp)

## **SUPPLEMENTARY FIGURE LEGENDS**

### **Supplementary Figure 1** Urinary flow and glucose excretion in Protocol 3.

Intraperitoneal injection of luseogliflozin significantly increased urinary flow (a) and glucose excretion (b) in SD rats. SD, Sprague Dawley; vehicle, SD rats treated with vehicle; luseogliflozin, SD rats treated with luseogliflozin. Values are mean  $\pm$  SEM.

\* $P < 0.05$  and \*\*\* $P < 0.001$  vs. baseline, # $P < 0.05$ , ## $P < 0.01$  and ### $P < 0.001$  vs. vehicle.

### **Supplementary Figure 2** Urinary sodium and potassium excretion in Protocol 3

Luseogliflozin treatment did not change urinary sodium (a) or potassium (b). SD, Sprague Dawley; vehicle, SD rats treated with vehicle; luseogliflozin, SD rats treated with luseogliflozin. Values are mean  $\pm$  SEM.

**Supplementary Figure 3** Urinary pH (a), urea concentration (b), urine osmolality (c), and free water clearance (d) in Protocol 3

SD, Sprague Dawley; vehicle, SD rats treated with vehicle; luseogliflozin, SD rats treated with luseogliflozin. Values are mean  $\pm$  SEM. \* $P$ <0.05 and \*\*\* $P$ <0.001 vs. baseline, # $P$ <0.05 and ###  $P$ <0.001 vs. vehicle.

**Supplementary Figure 4** Diagram of the study design for Protocols 1 and 2.

After anesthetizing Sprague Dawley (SD) rats with sodium pentobarbital and isoflurane, urine and blood are obtained at baseline. Luseogliflozin is given by intravenous and intraperitoneal injection in Protocols 1 and 2, respectively. Then, urine is collected every 30 min and blood pressure, heart rate, and renal blood flow are measured every 15 min. At the end of the experiments, blood is taken again.

**Supplementary Figure 5** Diagram of the study design for Protocol 3.

Sprague Dawley (SD) rats are anesthetized with inactin and the other experimental protocols are the same as before.

**Supplementary Table 1. Renal hemodynamics data of Protocol 3**

|                                                            |                              | vehicle     | luseogliflozin |
|------------------------------------------------------------|------------------------------|-------------|----------------|
| MAP (mmHg)                                                 | baseline                     | 89 ± 2      | 98 ± 6         |
|                                                            | 15                           | 92 ± 2      | 96 ± 4         |
|                                                            | 45                           | 90 ± 2      | 94 ± 4         |
|                                                            | 75                           | 91 ± 4      | 93 ± 5         |
|                                                            | 105                          | 89 ± 2      | 92 ± 5         |
|                                                            | 120                          | 89 ± 2      | 91 ± 4         |
|                                                            | HR (beat min <sup>-1</sup> ) | baseline    | 354 ± 4        |
| 15                                                         |                              | 355 ± 9     | 355 ± 7        |
| 45                                                         |                              | 349 ± 6     | 345 ± 5        |
| 75                                                         |                              | 347 ± 5     | 344 ± 4        |
| 105                                                        |                              | 347 ± 4     | 334 ± 4        |
| 120                                                        |                              | 362 ± 2     | 328 ± 8        |
| Mean RBF (fold)                                            |                              | baseline    | 1.00 ± 0.06    |
|                                                            | 5                            | 0.99 ± 0.06 | 1.04 ± 0.07    |
|                                                            | 10                           | 1.00 ± 0.06 | 1.03 ± 0.07    |
|                                                            | 15                           | 0.97 ± 0.04 | 1.00 ± 0.07    |
|                                                            | 30                           | 0.99 ± 0.04 | 0.99 ± 0.06    |
|                                                            | 60                           | 0.97 ± 0.04 | 1.02 ± 0.06    |
|                                                            | 90                           | 0.97 ± 0.04 | 1.05 ± 0.08    |
|                                                            | 120                          | 1.02 ± 0.03 | 1.03 ± 0.07    |
| CrCl (μl min <sup>-1</sup> g <sup>-1</sup><br>body weight) | baseline                     | 2.15 ± 0.37 | 2.23 ± 0.19    |
|                                                            | 30                           | 2.71 ± 0.25 | 2.72 ± 0.15    |
|                                                            | 60                           | 2.25 ± 0.18 | 2.68 ± 0.14    |
|                                                            | 90                           | 2.31 ± 0.37 | 2.53 ± 0.09    |
|                                                            | 120                          | 2.03 ± 0.36 | 2.66 ± 0.13    |

SD, Sprague-Dawley rats; MAP, mean blood pressure; HR, heart rate; RBF, renal blood flow; CrCl, creatinine clearance; vehicle, SD rats treated with vehicle; luseogliflozin, SD rats treated with luseogliflozin. Values are mean ± SEM.

Supplementary Figure 1.

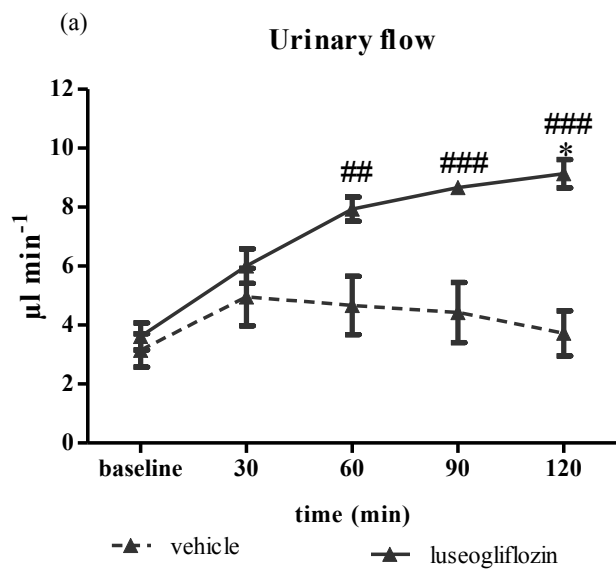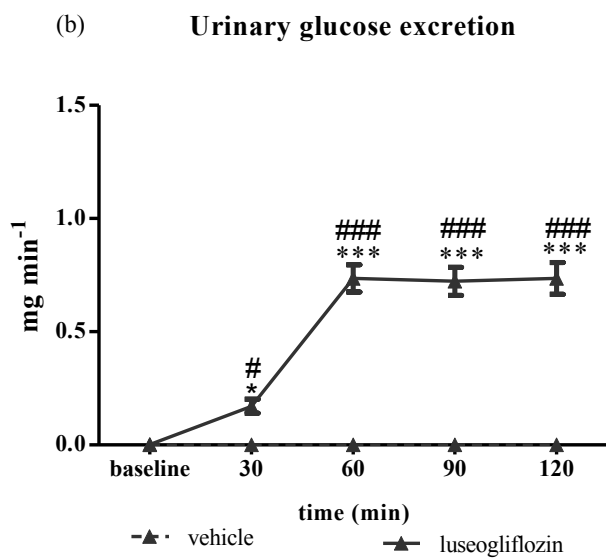

Supplementary Figure 2.

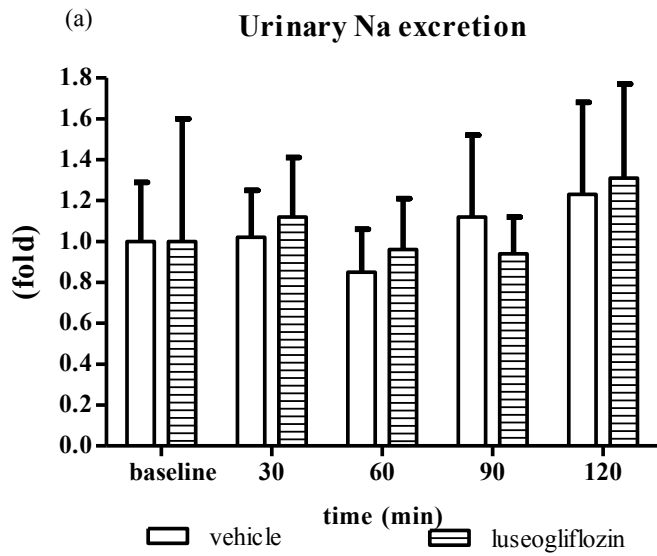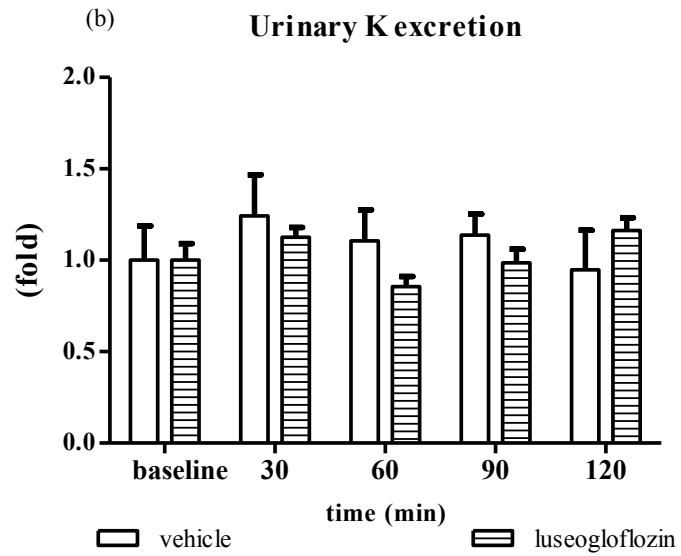

Supplementary Figure 3.

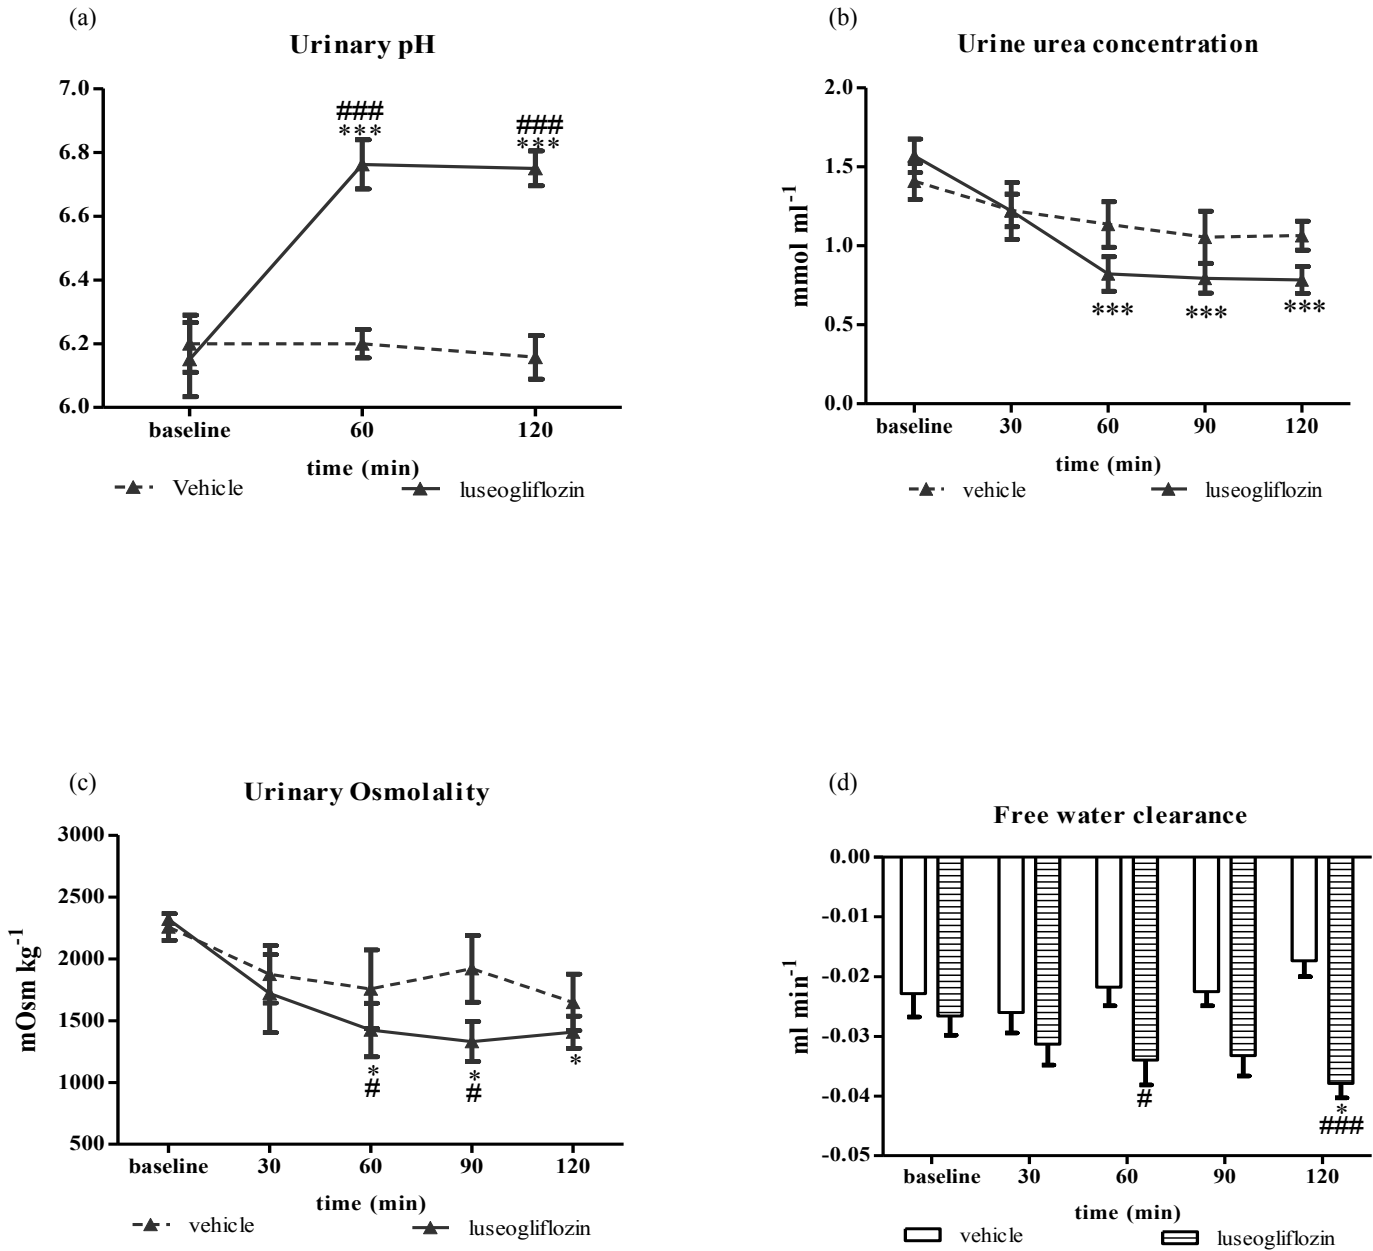



## Supplementary Figure 4.

### Protocol 1

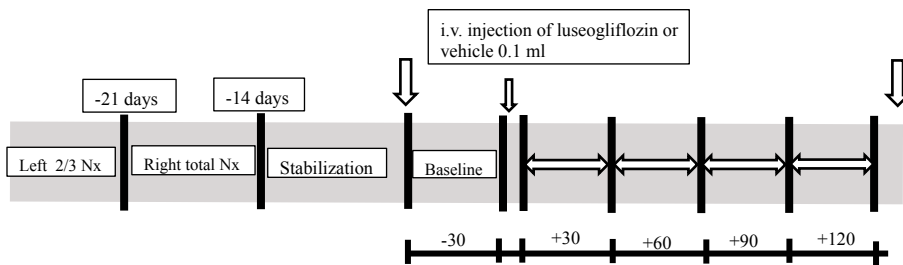

### Protocol 2

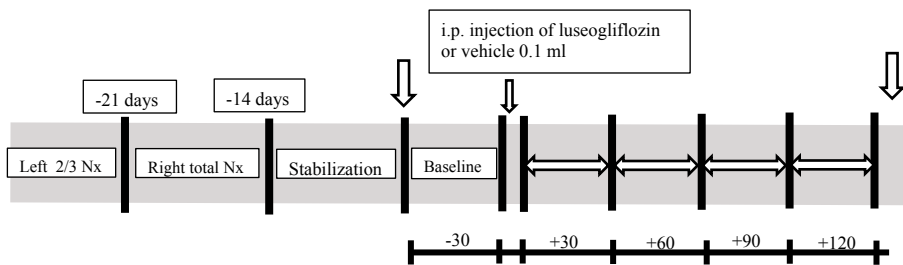

↓ = blood collection  
↔ = urine collection

## Supplementary Figure 5.

### Protocol 3

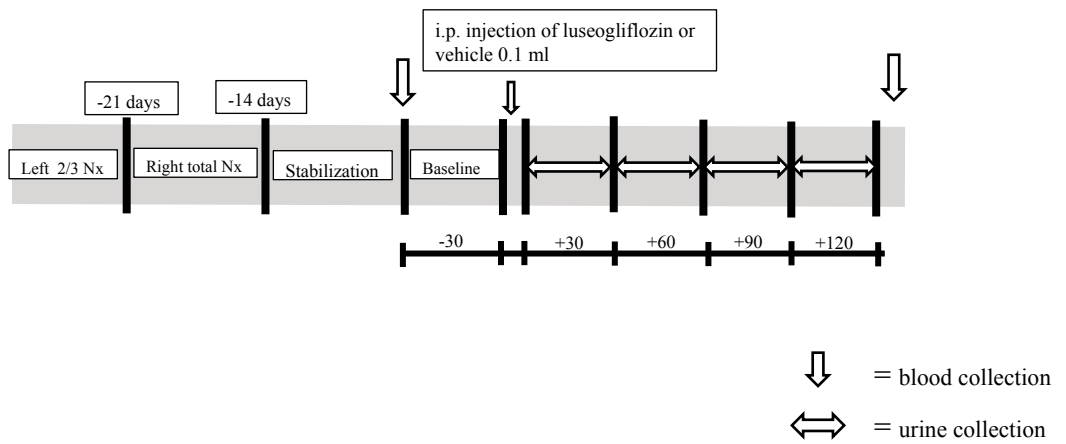

Supplement: 41598_2017_9352_MOESM1_ESM.pdf [file 41598_2017_9352_MOESM1_ESM.pdf]
